- LW, Balasubramanian K, Yusuf S, Devereaux PJ: Risk of stroke and other adverse outcomes in patients with perioperative atrial fibrillation 1 year after non-cardiac surgery. *Eur Heart J* 2020; 41:645–51
21. AlTurki A, Marafi M, Proietti R, Cardinale D, Blackwell R, Dorian P, Bessissow A, Vieira L, Greiss I, Essebag V, Healey JS, Huynh T: Major adverse cardiovascular events associated with postoperative atrial fibrillation after non-cardiac surgery: A systematic review and meta-analysis. *Circ Arrhythm Electrophysiol* 2020; 13:e007437
  22. Anselmi A, Possati G, Gaudino M: Postoperative inflammatory reaction and atrial fibrillation: Simple correlation or causation? *Ann Thorac Surg* 2009; 88:326–33
  23. Kim YM, Kattach H, Ratnatunga C, Pillai R, Channon KM, Casadei B: Association of atrial nicotinamide adenine dinucleotide phosphate oxidase activity with the development of atrial fibrillation after cardiac surgery. *J Am Coll Cardiol* 2008; 51:68–74
  24. Wu JH, Marchioli R, Silletta MG, Masson S, Sellke FW, Libby P, Milne GL, Brown NJ, Lombardi F, Damiano RJ Jr, Marsala J, Rinaldi M, Domenech A, Simon C, Tavazzi L, Mozaffarian D: Oxidative stress biomarkers and incidence of postoperative atrial fibrillation in the Omega-3 Fatty Acids for Prevention of Post-operative Atrial Fibrillation (OPERA) Trial. *J Am Heart Assoc* 2015; 4:e001886

## ANESTHESIOLOGY REFLECTIONS FROM THE WOOD LIBRARY-MUSEUM

### Ethereal Breath of the Gods: Always Circulating Aither

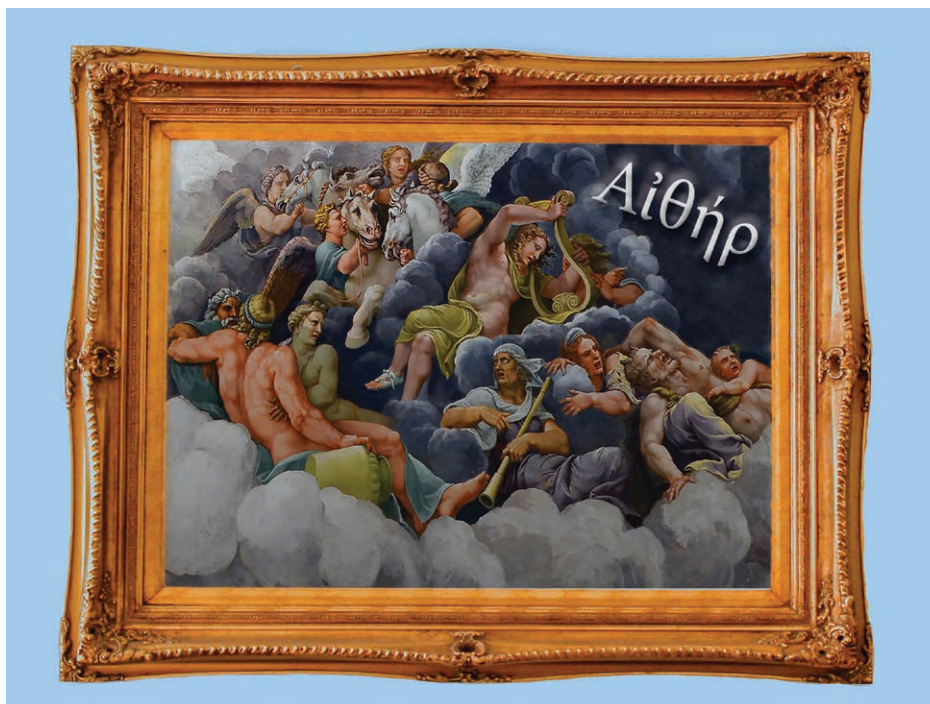

Humans breathe air. In contrast, the gods of ancient Greek mythology inspired *aither*, *aether*, or *ether*. Rather than the transparent gas inhaled by mortals, the deities breathed the blue gas found on mountain tops and in the heavens—all that lofty atmosphere above ground but beneath the solid dome of the Sky (*Ouranos*, Latinized as *Uranus*). Unlike earthly elements, which moved linearly, *Aither* circulated around heavenly bodies in circular orbits within ethereal spheres. In his *Cratylus*, Plato suggests that *aither* derives from *aei thein* (“always running”). *Aither* also serves as a backdrop for parts of Giulio Romano’s c.1533 *trompe l’oeil* frescoed ceiling in the *Chamber of the Giants* (a portion above), Palazzo del Te, Mantua, Italy. Volatile and intoxicating, our earthly anodyne, ether, may have seemed a gift from the gods. Alas, the only “blues” ether elicited in 19th-century mortals arose from recreational overindulgence. (Copyright © the American Society of Anesthesiologists’ Wood Library-Museum of Anesthesiology. [www.woodlibrarymuseum.org](http://www.woodlibrarymuseum.org))

Melissa L. Coleman, M.D., Assistant Professor, Department of Anesthesiology and Perioperative Medicine, Penn State College of Medicine, Hershey, Pennsylvania, and George S. Bause, M.D., M.P.H., Wood Library-Museum Curator Emeritus.
